# Supplementary material for: Synthesis and Structure–Activity Relationship of Salvinal Derivatives as Potent Microtubule Inhibitors
Source: MDPI journal article supplement (doi:10.3390/ijms24076386), 2023-03-28
Supplement: s1 [file s1]

## SUPPLEMENTARY MATERIAL

### Synthesis and Structure-Activity Relationship of Salvinal Derivatives as Potent Microtubule Inhibitors

Chi-I Chang <sup>1,†</sup>, Cheng-Chih Hsieh <sup>2,3,†</sup>, Yung-Shung Wein <sup>4</sup>, Ching-Chuan Kuo <sup>5,6</sup>, Chi-Yen Chang <sup>7</sup>, Jrhau Lung <sup>8</sup>, Jong-Yuh Cherng <sup>9</sup>, Po-Chen Chu <sup>10</sup>, Jang-Yang Chang <sup>5,11, 12,\*</sup>, Yueh-Hsiung Kuo <sup>13,14,15,\*</sup>

<sup>1</sup> Department of Biological Science and Technology, National Pingtung University of Science and Technology, Pingtung 912, Taiwan

<sup>2</sup> Department of pharmacy, Kaohsiung Veterans General Hospital, Kaohsiung 813, Taiwan

<sup>3</sup> School of Pharmacy and Institute of Pharmacy, National Defense Medical Center, Taipei 114, Taiwan

<sup>4</sup> Department of Chemistry, National Taiwan University, Taipei 114, Taiwan

<sup>5</sup> Institute of Biotechnology and Pharmaceutical Research, National Health Research Institutes, Miaoli 350, Taiwan

<sup>6</sup> Graduate Institute of Biomedical Sciences, China Medical University, Taichung 404, Taiwan; Road, Tainan 704, Taiwan

<sup>7</sup> National Institute of Cancer Research, National Health Research Institutes, Miaoli 350, Taiwan

<sup>8</sup> Department of Medical Research and Development, Chiayi Chang Gung Memorial Hospital, Chiayi Branch, Chiayi 613, Taiwan

<sup>9</sup> Department of Chemistry and Biochemistry, National Chung Cheng University, Chiayi 613, Taiwan

<sup>10</sup> Department of Cosmeceutics and Graduate Institute of Cosmeceutic, China Medical University, Taichung 404, Taiwan

<sup>11</sup> Taipei Cancer Center, Taipei Medical University Hospital, Taipei 110, Taiwan

<sup>12</sup> TMU Research Center of Cancer Translational Medicine, Taipei Medical University, Taipei 110, Taiwan

<sup>13</sup> Department of Chinese Pharmaceutical Sciences and Chinese Medicine Resources, College of Pharmacy, China Medical University, Taichung 404, Taiwan

<sup>14</sup> Department of Biotechnology, Asia University, Taichung 413, Taiwan

<sup>15</sup> Chinese Medicine Research Center, China Medical University, Taichung 404, Taiwan

## CONTENT

**Figure S1.**  $^1\text{H}$ -NMR spectrum of compound **4** in  $\text{CDCl}_3$

**Figure S2.**  $^{13}\text{C}$ -NMR spectrum and DEPT of compound **4** in  $\text{CDCl}_3$

**Figure S3.** IR spectrum of compound **4**

**Figure S4.** Mass spectrum of compound **4**

**Figure S5.**  $^1\text{H}$ -NMR spectrum of compound **19** in  $\text{CDCl}_3$

**Figure S6.**  $^{13}\text{C}$ -NMR spectrum and DEPT of compound **19** in  $\text{CDCl}_3$

**Figure S7.** IR spectrum of compound **19**

**Figure S8.** Mass spectrum of compound **19**

**Figure S9.**  $^1\text{H}$ -NMR spectrum of compound **20** in  $\text{CDCl}_3$

**Figure S10.**  $^{13}\text{C}$ -NMR spectrum and DEPT of compound **20** in  $\text{CDCl}_3$

**Figure S11.** IR spectrum of compound **20**

**Figure S12.** Mass spectrum of compound **20**

**Figure S13.**  $^1\text{H}$ -NMR spectrum of compound **25** in  $\text{CDCl}_3$

**Figure S14.**  $^{13}\text{C}$ -NMR spectrum and DEPT of compound **25** in  $\text{CDCl}_3$

**Figure S15.** IR spectrum of compound **25**

**Figure S16.** Mass spectrum of compound **25**

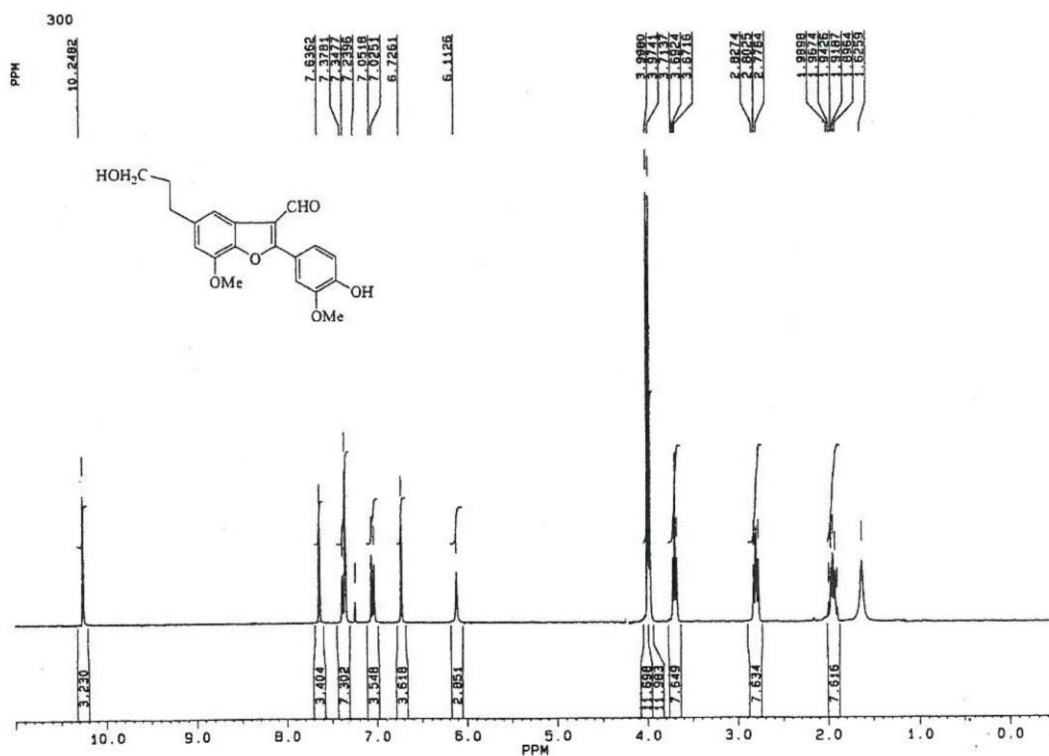

Figure S1. <sup>1</sup>H-NMR spectrum of compound 4 in CDCl<sub>3</sub>

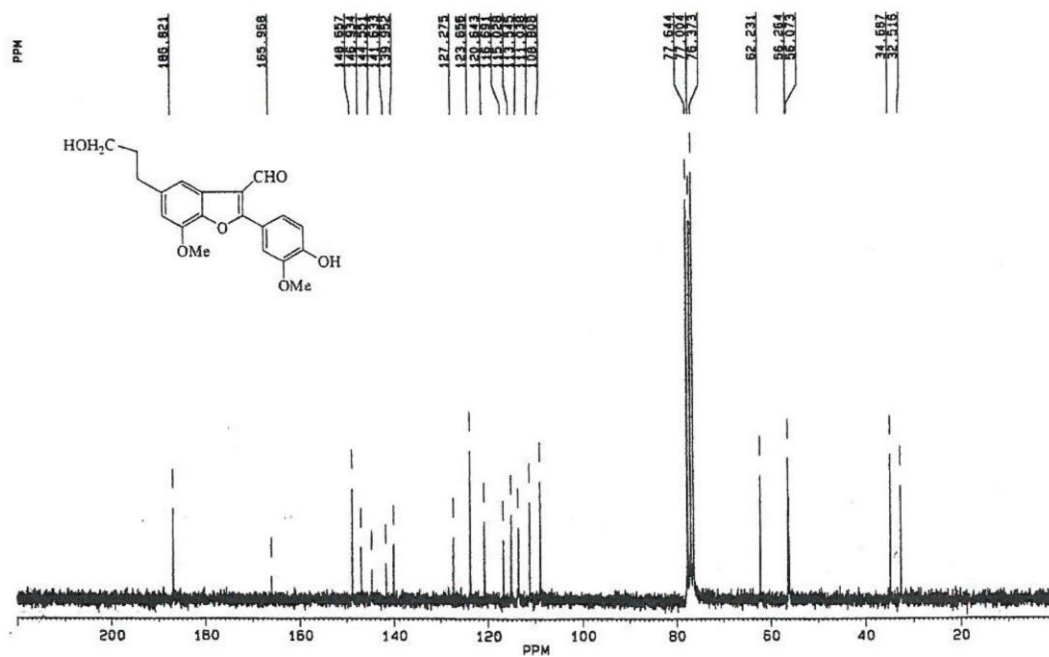

Figure S2. <sup>13</sup>C-NMR spectrum and DEPT of compound 4 in CDCl<sub>3</sub>

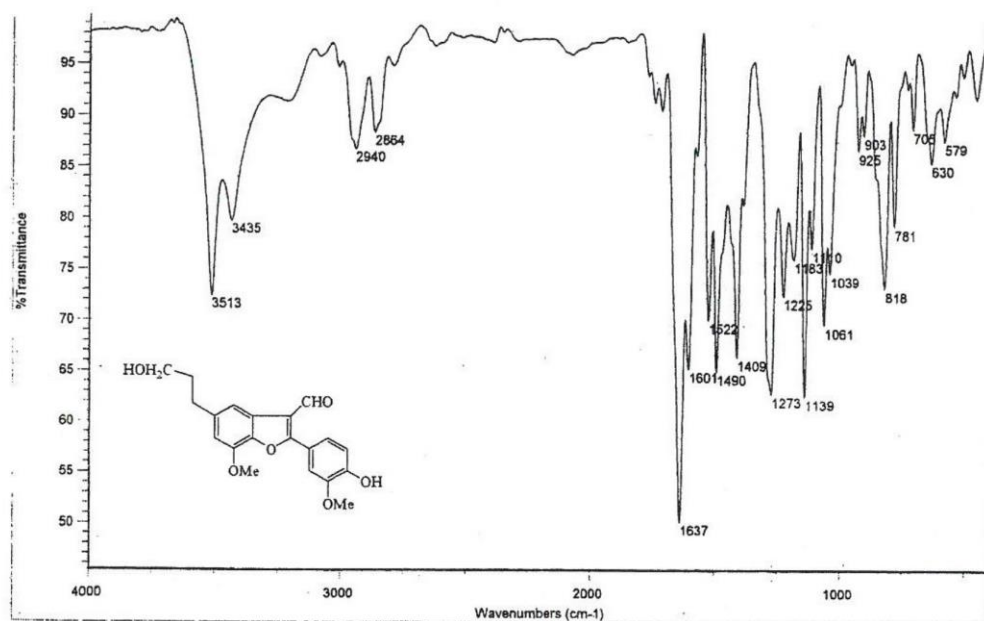

Figure S3. IR spectrum of compound 4

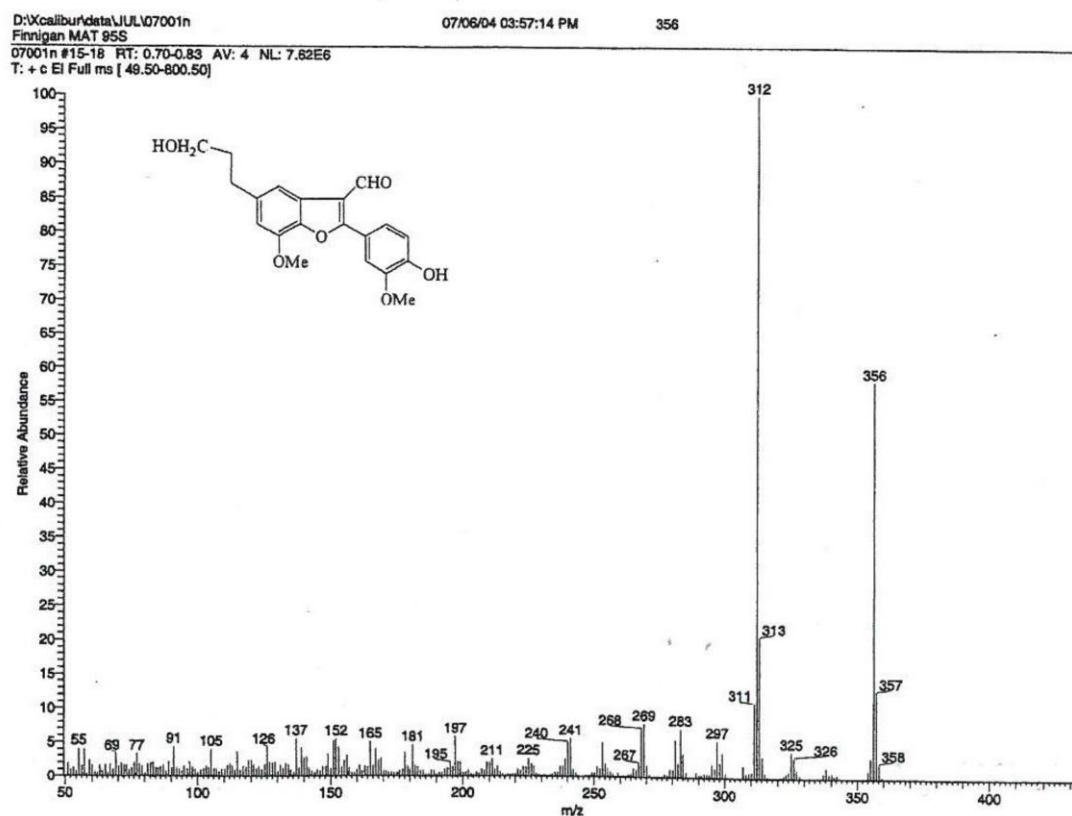

Figure S4. Mass spectrum of compound 4

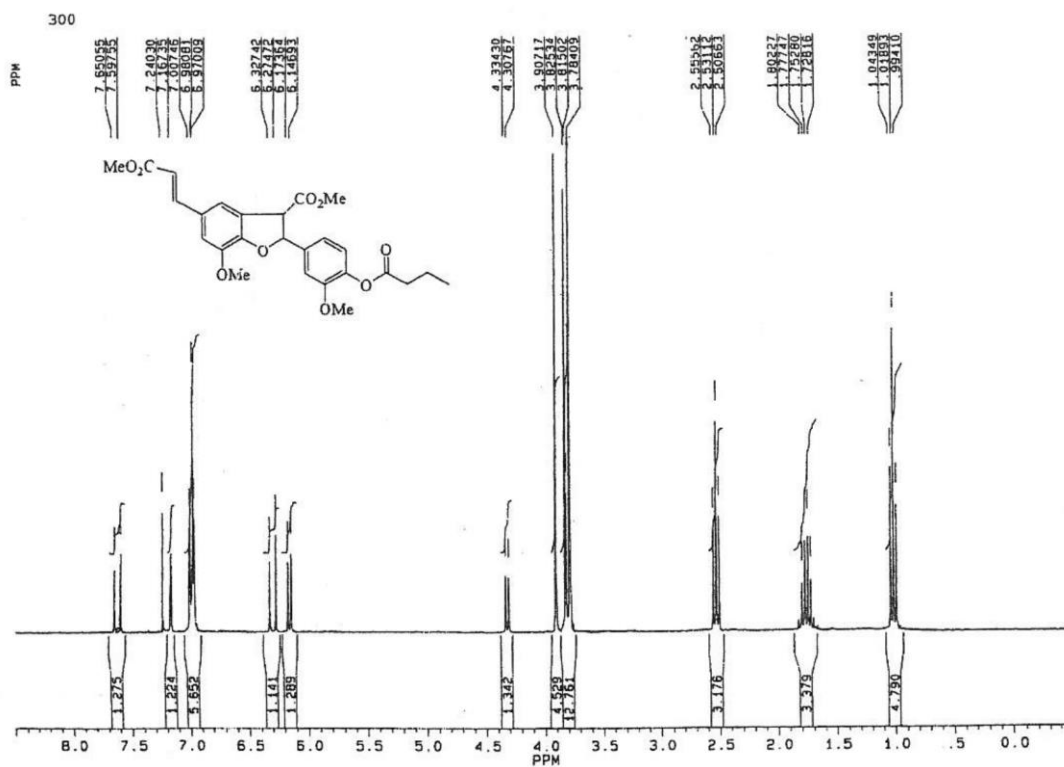

Figure S5. <sup>1</sup>H-NMR spectrum of compound 19 in CDCl<sub>3</sub>

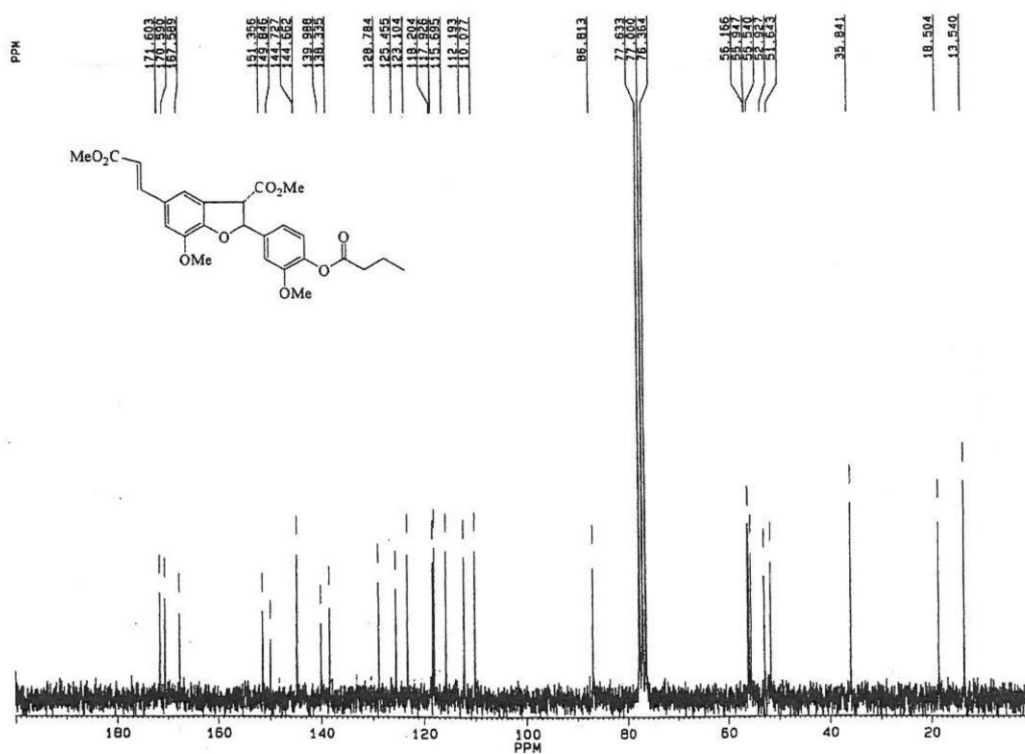

Figure S6. <sup>13</sup>C-NMR spectrum and DEPT of compound 19 in CDCl<sub>3</sub>

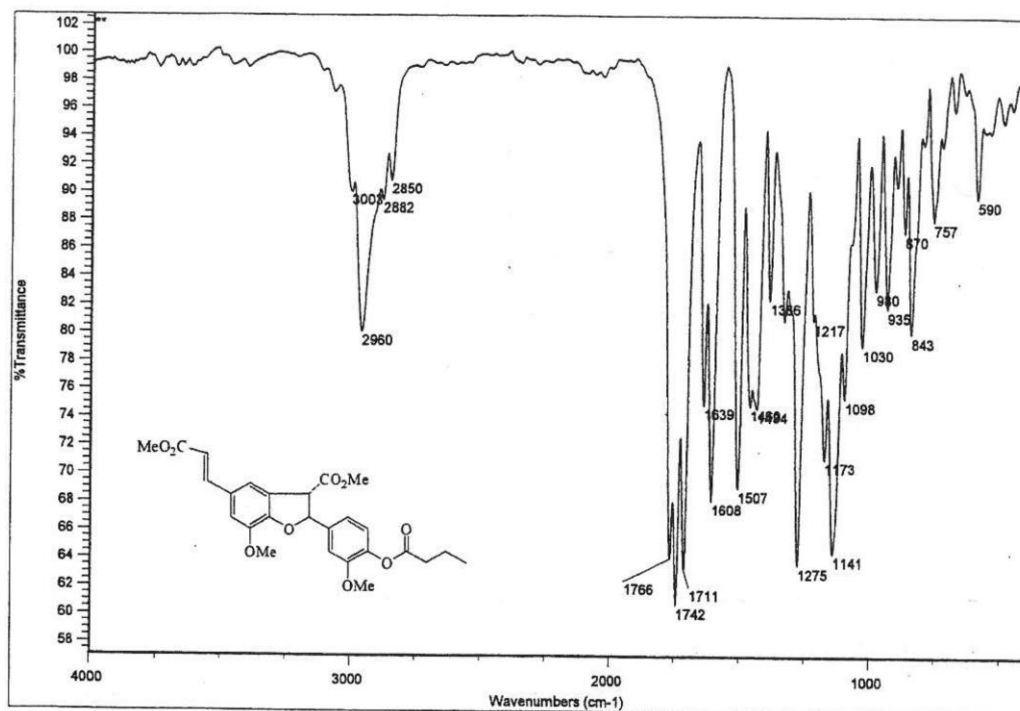

Figure S7. IR spectrum of compound 19

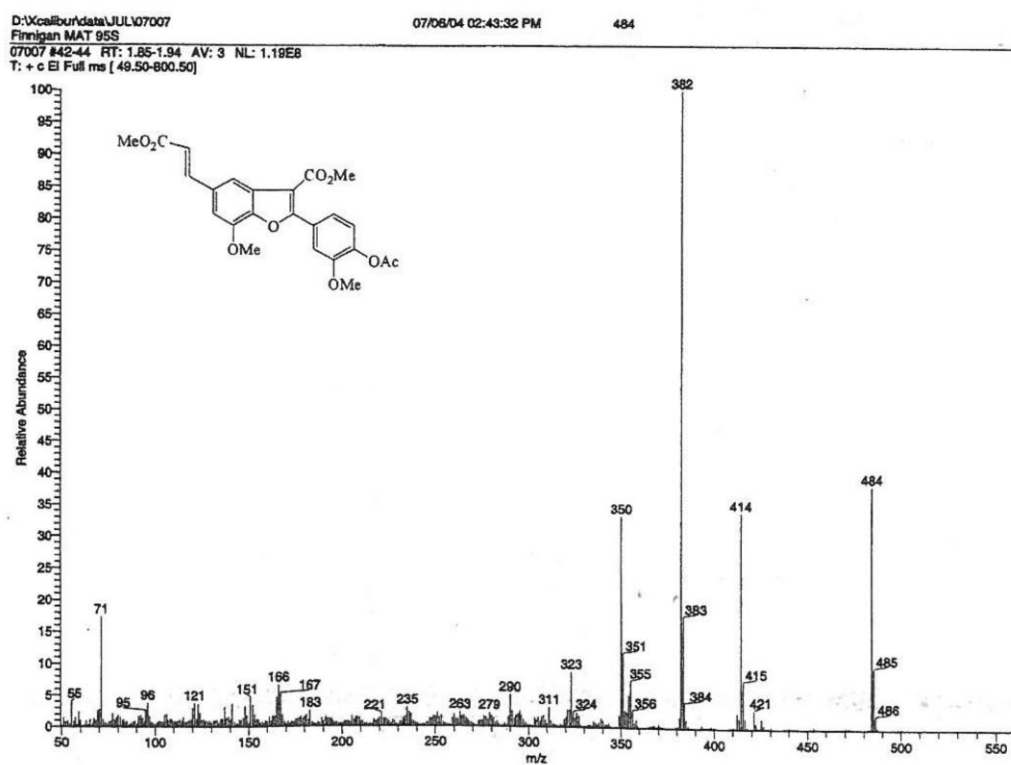

Figure S8. Mass spectrum of compound 19

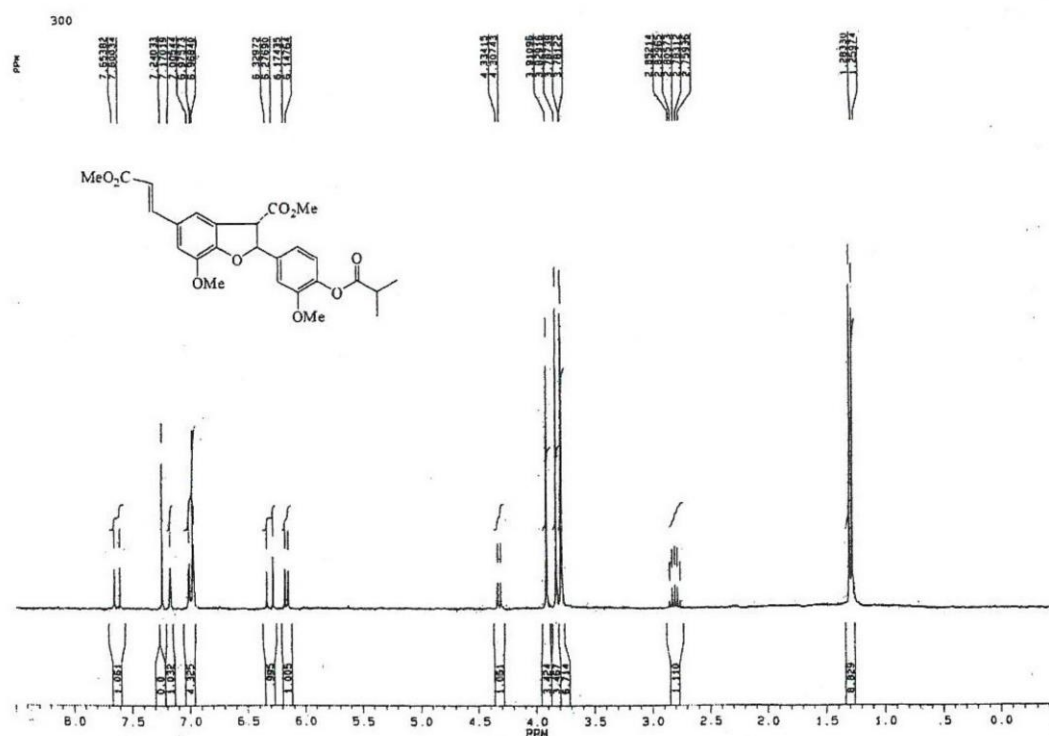

Figure S9. <sup>1</sup>H-NMR spectrum of compound 20 in CDCl<sub>3</sub>

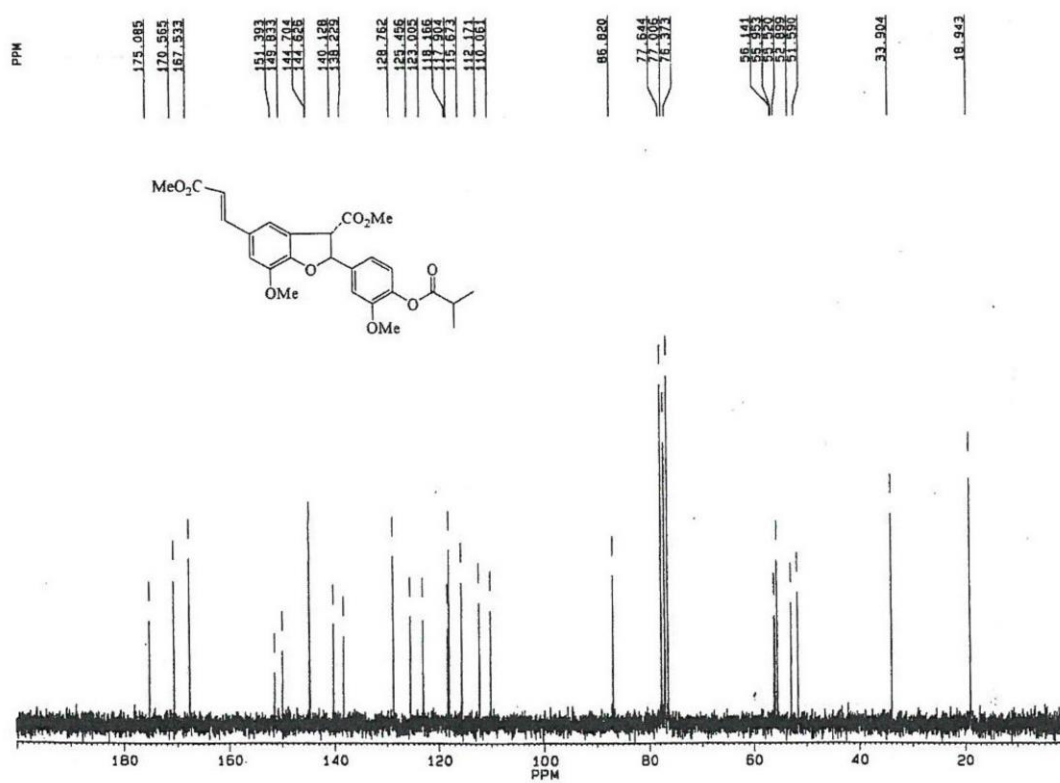

Figure S10. <sup>13</sup>C-NMR spectrum and DEPT of compound 20 in CDCl<sub>3</sub>

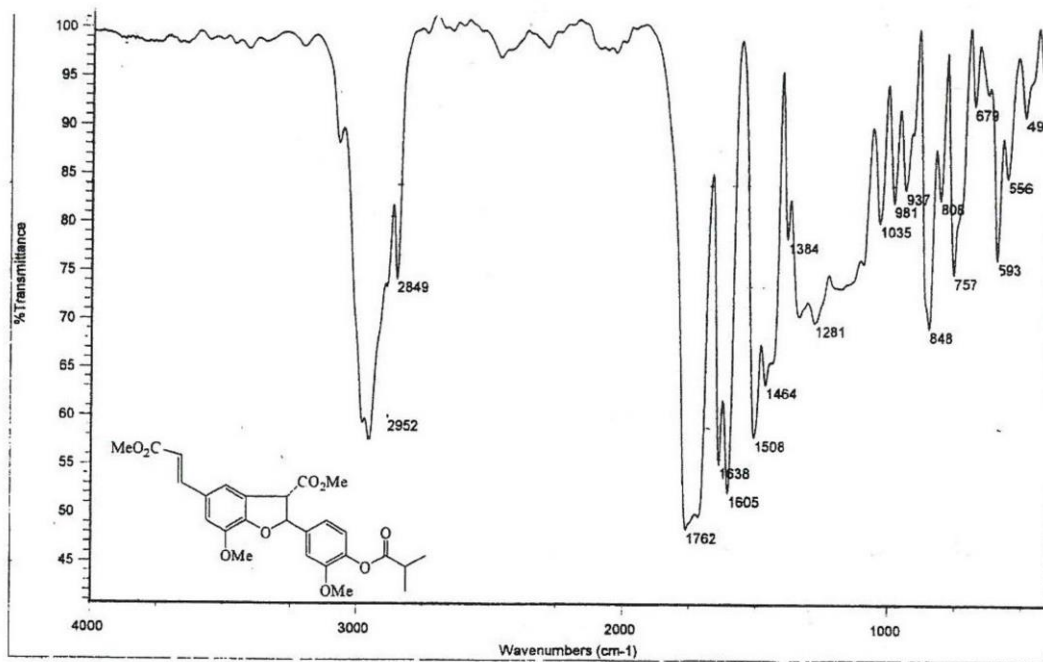

Figure S11. IR spectrum of compound 20

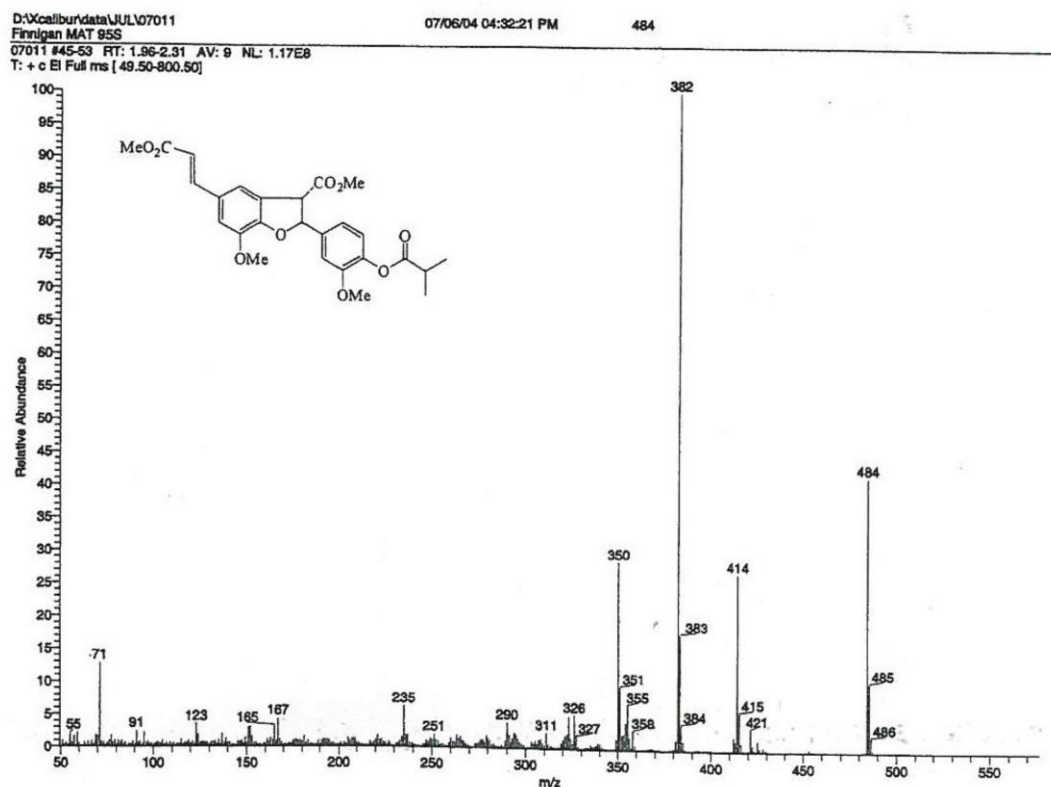

Figure S12. Mass spectrum of compound 20



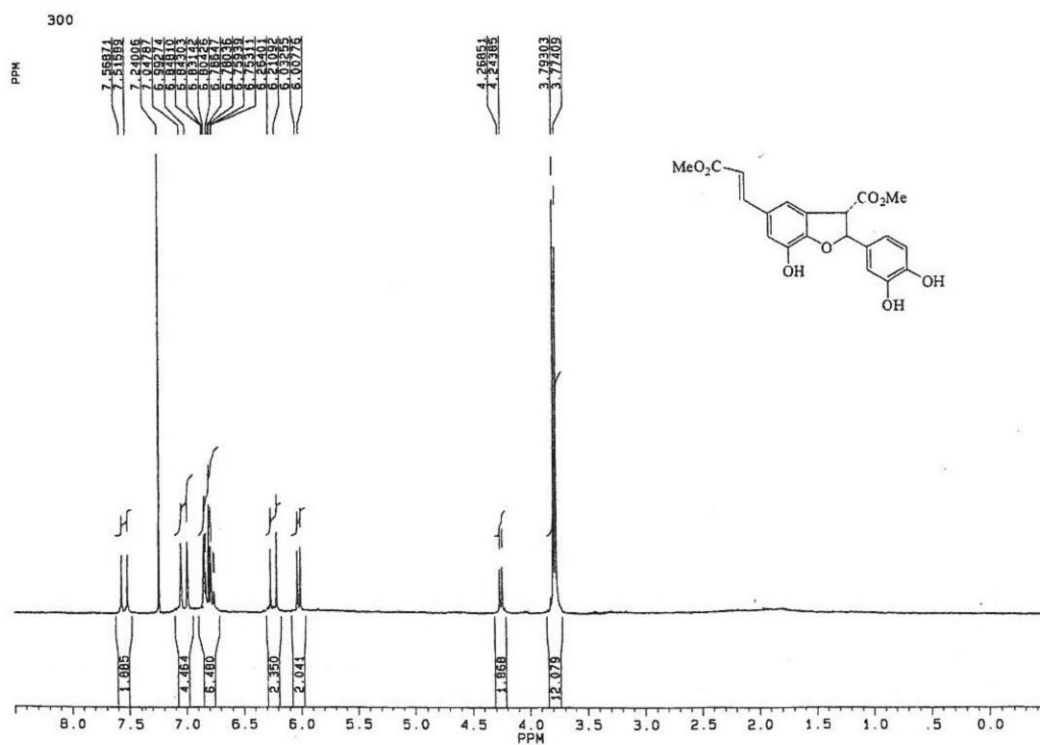

**Figure S13.** <sup>1</sup>H-NMR spectrum of compound **25** in CDCl<sub>3</sub>

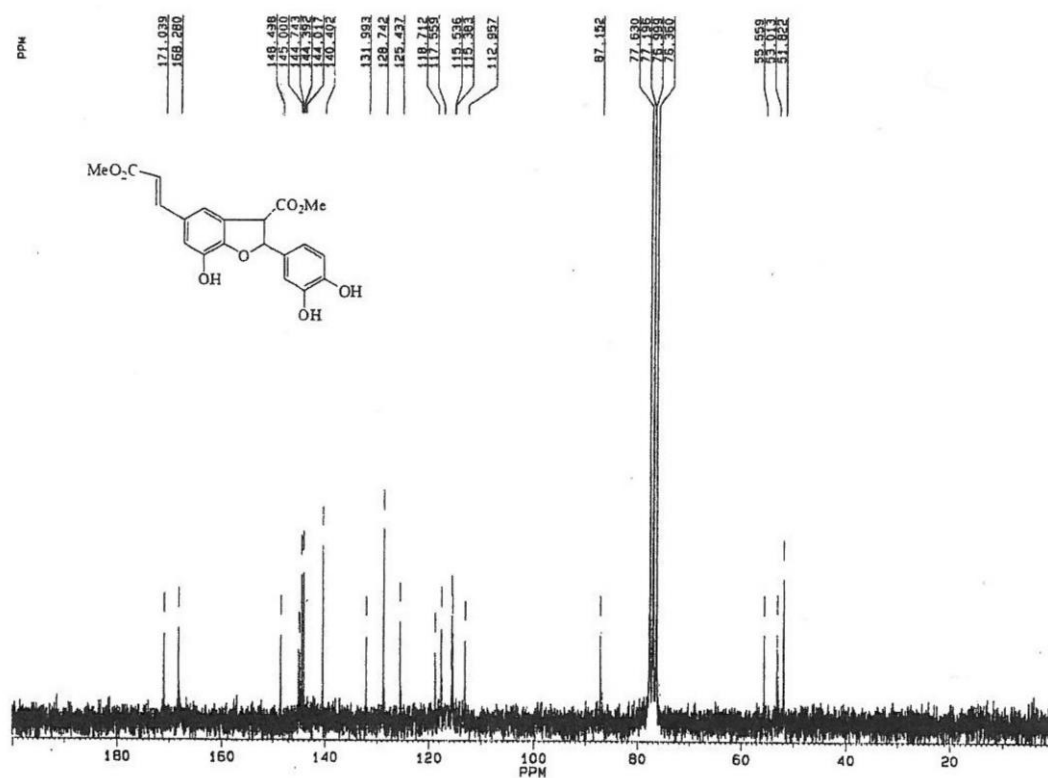

**Figure S14.** <sup>13</sup>C-NMR spectrum and DEPT of compound **25** in CDCl<sub>3</sub>

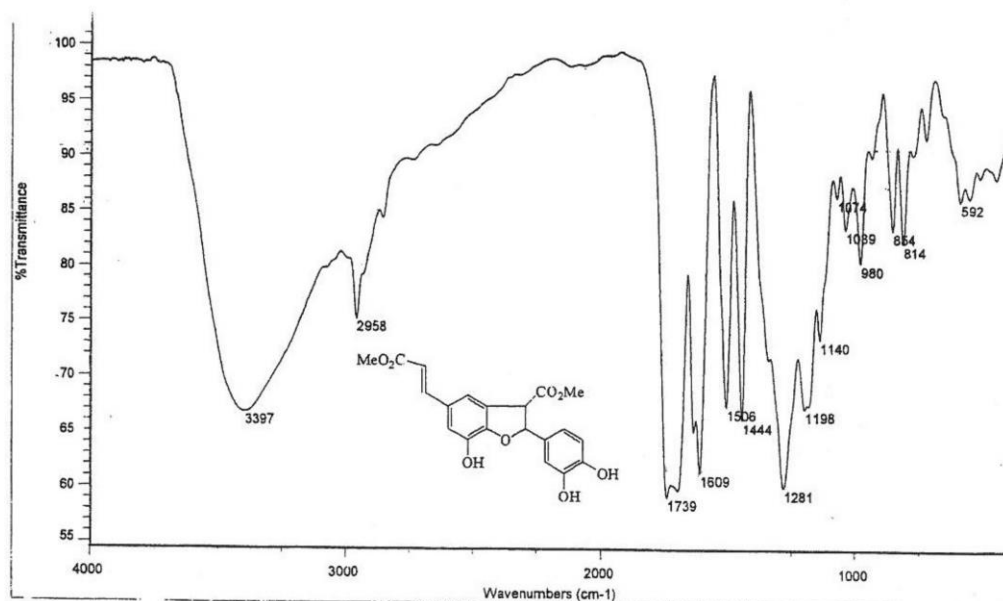

Figure S15. IR spectrum of compound 25

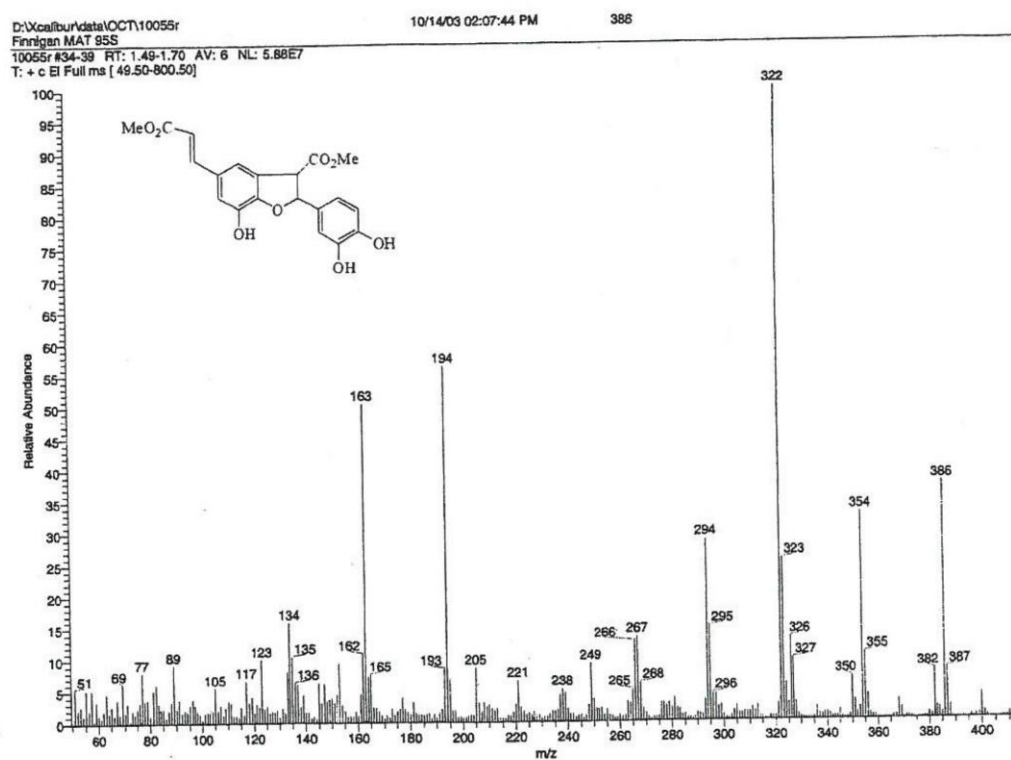

Figure S16. Mass spectrum of compound 25
